# Supplementary material for: Predicting Human Nucleosome Occupancy from Primary Sequence
Source: PubMed Central journal article supplement (PMC2515632; doi:10.1371/journal.pcbi.1000134), 2008-08-22
Supplement: pcbi.1000134.s001.pdf [file pcbi.1000134.s001.pdf]

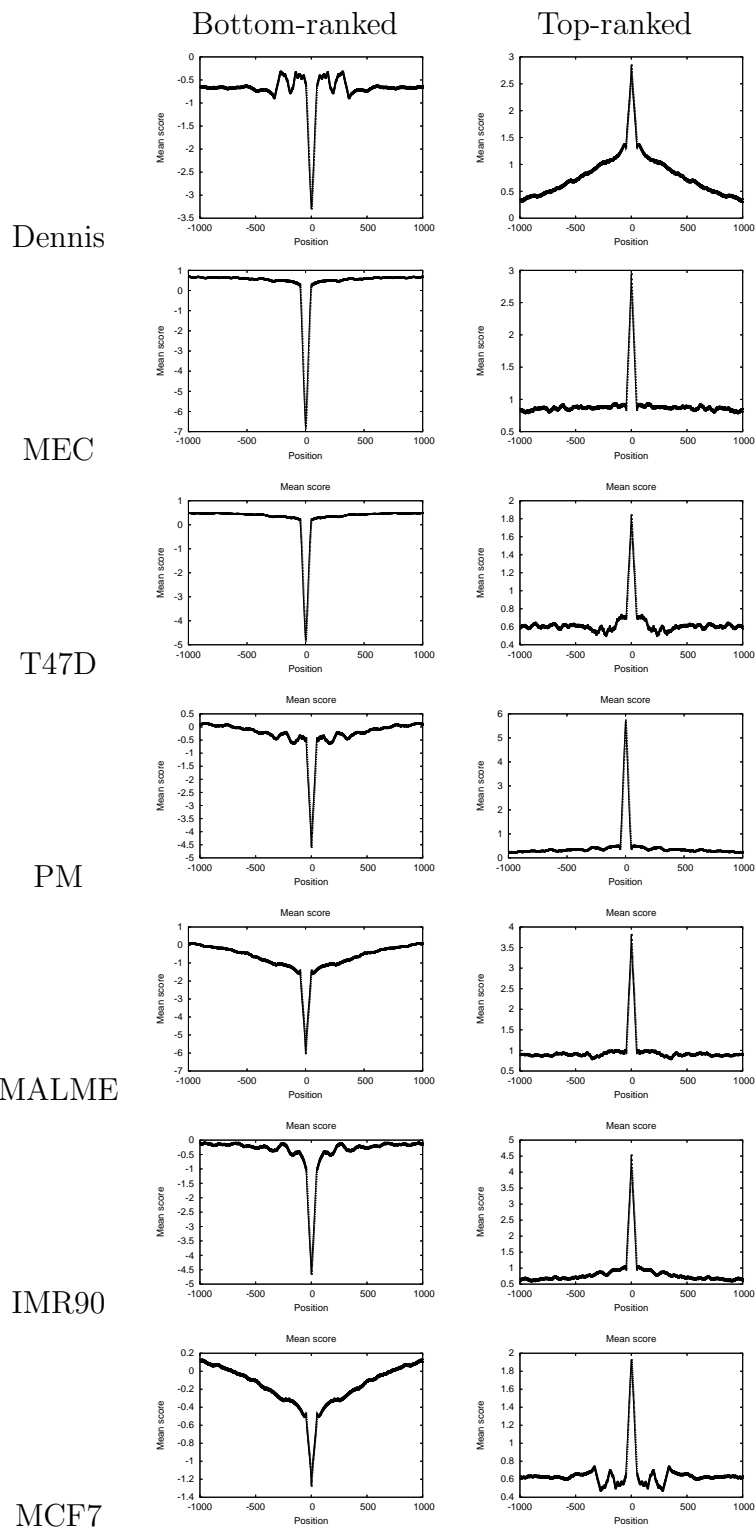

**Figure S1:** This figure is similar to Figure 5, but the panels were generated using top- and bottom-scoring probes from each of the SVMs.
